# Supplementary material
Source: PubMed Central journal article supplement (PMC3207667)
Supplement: 1115387108_pnas.201115387SI.pdf [file 1115387108_pnas.201115387SI.pdf]

# Supporting Information

Zimmermann et al. 10.1073/pnas.1115387108

## SI Materials and Methods

**Behavioral Assays. Paw flick.** Noxious heat thresholds were determined according to the Hargreave's test (1). Three consecutive measurements were averaged.

**Cold plate.** A cold plate (0 °C) was used to assess aversive behavior in response to noxious cold. The amount of flinching, shaking, and paw lifting was counted over 5 min.

**Von Frey thresholds.** Mechanical sensitivity was determined using calibrated Von Frey fibers. Fibers were applied through a mesh floor, six times each in ascending order of force, until a response (paw withdrawal, shaking or biting, jumping) was elicited. Percent responses were calculated for each fiber application.

**Temperature choice assay.** A two-plate assay was constructed by joining separately controlled quadratic Peltier plates. An opaque Plexiglas rectangular box formed semidivided chambers of equal size. The behavior of the mice was videotaped, and the time spent on each side was analyzed over 5 min.

## Dorsal Root Ganglion Neuronal Cultures and Ca<sup>2+</sup> Measurements.

Adult mice were euthanized by CO<sub>2</sub> inhalation. Dorsal root ganglions (DRGs) from all spinal levels were removed and incubated in 0.6 mg/mL collagenase (Sigma) and 3 mg/mL protease (Sigma) for 30 min at 37 °C in DMEM supplemented with 5 mg/100 mL gentamicin. Ganglia were triturated with a glass pipette, and neurons were plated onto borosilicate glass coverslips (Electron Microscopy Sciences) previously treated with poly-D-lysine (0.1 mg/mL) for 1 h (Sigma). Cells were cultured (37 °C, 5% CO<sub>2</sub>) in serum-free TNB-100 base medium (Cedarlane), supplemented with 50 µg/mL penicillin/streptomycin (Invitrogen) and 100 ng/mL nerve growth factor-7S (Alomone). Calcium imaging/patch clamp recordings were made after ~15–18 h in culture. DRGs were loaded with 15 µM Fura2-AM (Invitrogen) dissolved in TNB medium (for 60–70 min) followed by a 15-min washout in TNB medium. Ca<sup>2+</sup>-dependent fluorescence transients were recorded in response to perfusion of cold solutions at defined temperatures. Cells were excited with 340 and 380 nM light, and emissions >510 nM were captured by a CCD camera. Intracellular Ca<sup>2+</sup> ratios (2) were calculated using Slidebook software (Olympus). Cells were considered menthol responsive (250 µM), capsaicin responsive (10 µM), or allyl isothiocyanate-responsive (100 µM) when Ca<sup>2+</sup> increased >25% above baseline. Cells were considered cold sensitive when Ca<sup>2+</sup> increased >15% above baseline (apparent Ca<sup>2+</sup> fluorescence decreased by 5–10% in cold-insensitive cells during cold stimulation). To prepare compounds, menthol (Sigma) was dissolved in ethanol and stored at –20 °C at 0.1M. Capsaicin and allyl isothiocyanate were stored in ethanol:DMSO (1:1) at –20 °C.

**Patch Clamp Recordings.** HM1 cells (HEK293 cells stably expressing human muscarinic M1 receptor) were maintained in DMEM/F12 (1:1), supplemented with 10% FBS and 10,000 U/mL penicillin/streptomycin in 5% CO<sub>2</sub>. Carboxyl-terminal-tagged mouse transient receptor potential (TRP) cation channel, subfamily C member 5 (TRPC5)-EGFP and TRP channel subfamily C, member 1 (TRPC1)-YFP were transiently transfected using Lipofectamine 2000 (Invitrogen). Cells were recorded 24–48 h after transfection. Recordings were performed at defined temperatures (3) in extracellular solution containing (in mM): 140 NaCl, 5 KCl, 2 CaCl<sub>2</sub>, 1 MgCl<sub>2</sub>, 10 Hepes, and 10 glucose (adjusted to pH 7.4 with NaOH). The pipette (intracellular) solution contained (in mM): 120 Cs-Mes, 10 Cs<sub>4</sub>-BAPTA, 10 Hepes, 2 Mg-ATP, 0.4 Na<sub>2</sub>-GTP, 0.47 MgCl<sub>2</sub>, and 3.26 CaCl<sub>2</sub>. Whole-cell recordings

were acquired at 5 kHz and low-pass filtered (eight-pole Bessel) at 2 kHz. Capacity current was reduced using amplifier circuitry; series resistance compensation was set to 60–80%. Pipettes were heat-polished to a final resistance of 1.3–1.8 MΩ. Carbachol and lanthanum (Sigma) were prepared as stock solutions in distilled water and stored at –20 °C. Temperature coefficients (Q<sub>10</sub>) were estimated by plotting log (I/I<sub>max</sub>) vs. temperature. Statistical data are presented as mean ± SEM. Student's *t* test was calculated, and *P* < 0.05 was considered statistically significant.

**Single Nerve Fiber Electrophysiology.** The isolated skin saphenous nerve preparation and single-fiber recording technique was used (4, 5) on male littermates of WT and TRPC5<sup>-/-</sup> mice (*n* = 32) weighing 20–32 g and on 129S1/SvImJ mice (*n* = 17) (Jackson Labs).

**Mechanosensitive C- and A-fibers.** Mechanical probing identified C- and A-fibers. Heat and cold stimulation were applied as previously described (4). Heat ramps from 30–50 °C were applied over 20 s. A discharge of at least two spikes identified heat responsiveness in a mechanosensitive fiber [C-mechano-heat (CMH), polymodal nociceptor]. The noxious heat threshold was set as the temperature of the first spike discharged. In fibers with ongoing activity before heat stimulation, the threshold value was the bath temperature. Temperature was cooled from 30 °C to ~10 °C over 60 s. The criteria for assigning cold responsiveness [C-mechano-cold (CMC), cold nociceptor] and cold and heat responsiveness [C-mechano-cold-heat (CMCH), multimodal nociceptor] was a discharge of at least three spikes within one period of stimulation in a mechanosensitive C-fiber and a discharge of at least three spikes within two periods of stimulation in A-fibers. The noxious cold threshold was assigned as the first spike during cooling.

**Sensitization to cold by menthol.** CMC/CMCH-fibers [WT: 21 (of 22), TRPC5<sup>-/-</sup>: 19 (of 23)] were treated with 500 µM menthol. Menthol sensitivity was defined as a response when (i) the initial control spike number was increased by 20% in response to cold; (ii) peak discharge increased by 1.5-fold; or (iii) the threshold of activation shifted by ≥2 °C.

**Specific cold receptors in C-cold fibers.** Specific cold receptors in C-cold (CC)-fibers were identified by response to cold-water stimulus. Electrostimulation and cold stimulation were applied simultaneously to the receptive field to evoke activity-dependent slowing and to distinguish single from multifiber recordings (marking test) (4). In cases of ongoing discharge at 30 °C, the temperature was raised until ongoing discharge ceased, and the temperature at which discharge ceased was defined as the threshold. Nine of 11 WT fibers and 6 of 10 TRPC5<sup>-/-</sup> fibers were treated with menthol. Menthol-induced sensitization resulted in increased adaptation and a prominent shift in dynamic range to warmer temperatures, i.e., inducing discharge at constant warm temperatures at which there was no discharge without menthol (Fig. S5). Wilcoxon matched-pairs (intra-individual) and Mann-Whitney *U* or  $\chi^2$  tests (between groups) were calculated. Differences were considered significant at *P* < 0.05 (Statistica version 6; StatSoft). All results are graphed as mean ± SEM. Skin-nerve electrophysiology experiments were random-choice experiments and therefore not blinded.

**Immunolabeling.** Cryostat- or paraffin-embedded sections (3–8 µm) were prepared from fresh-frozen or paraformaldehyde-fixed (4%) tissues, respectively. Institutional approval was obtained for the use of existing human samples. For paraffin-embedded sections, deparaffinization and dehydration for 5 min (xylene ×3, 100% ethanol ×2, 95% ethanol ×1, 70% ethanol ×1, and PBS ×1)

was followed by boiling slides in Trilogy (Cell Marque) for antigen retrieval and subsequent rinsing in deionized water for 15 min (6). All sections were blocked in 1% BSA and 0.3% Triton X-100 in PBS and were incubated with a variety of previously characterized antibodies (Table S1).

**Fluorophore-labeling of mouse monoclonal TRPC5 antibody.** We used the mouse monoclonal TRPC5 antibody (NeuroMab) (Table S1), exchanged the buffer to PBS with Econo-Pac 10 DG column (Bio-Rad), and labeled with DyLight 488 Amine-Reactive Dye (Thermo Scientific) according to manufacturer's protocol. Excess dye was removed using the Econo-Pac 10 DG column, and the fluorophore-labeled antibody was concentrated with an Amicon Ultra 10,000 MWCO centrifugal filter.

**Immunohistochemistry and fluorescence.** Visualization was achieved via HRP-conjugated multimer antibody reagent (Igs; Ventana) in

combination with diaminobenzidine as the chromogen (Ultra-view; Ventana) or incubation with AlexaFluor 555- or 488-coupled secondary antibodies (Invitrogen). After counterstaining (Hoechst 33258 or hematoxylin), sections were mounted on glass slides and viewed on an epifluorescence-, confocal-, or traditional light microscope.

**Quantification.** Labeled cells were assessed blinded to genotype and quantified according to previously published protocols (7, 8). For fluorescence microscopy, sections were viewed and quantified using a Zeiss Axiovert 200 inverted fluorescence microscope, an Olympus AX70 epi-fluorescence microscope or were scanned by using a Scancope XT system (Aperio). Image processing was performed using ImageJ (v. 1.37v <http://rsb.info.nih.gov/ij/>) and Photoshop CS3 (Adobe Systems).

- Hargreaves K, Dubner R, Brown F, Flores C, Joris J (1988) A new and sensitive method for measuring thermal nociception in cutaneous hyperalgesia. *Pain* 32:77–88.
- Gryniewicz G, Poenie M, Tsien RY (1985) A new generation of Ca<sup>2+</sup> indicators with greatly improved fluorescence properties. *J Biol Chem* 260:3440–3450.
- Dittert I, et al. (2006) Improved superfusion technique for rapid cooling or heating of cultured cells under patch-clamp conditions. *J Neurosci Methods* 151:178–185.
- Zimmermann K, et al. (2009) Phenotyping sensory nerve endings in vitro in the mouse. *Nat Protoc* 4:174–196.
- Zimmermann K, et al. (2007) Sensory neuron sodium channel Nav1.8 is essential for pain at low temperatures. *Nature* 447:855–858.
- Cadwell K, et al. (2008) A key role for autophagy and the autophagy gene Atg161 in mouse and human intestinal Paneth cells. *Nature* 456:259–263.
- Hager UA, et al. (2008) Morphological characterization of rat Mas-related G-protein-coupled receptor C and functional analysis of agonists. *Neuroscience* 151:242–254.
- Lennerz JK, et al. (2008) Calcitonin receptor-like receptor (CLR), receptor activity-modifying protein 1 (RAMP1), and calcitonin gene-related peptide (CGRP) immunoreactivity in the rat trigeminovascular system: Differences between peripheral and central CGRP receptor distribution. *J Comp Neurol* 507:1277–1299.

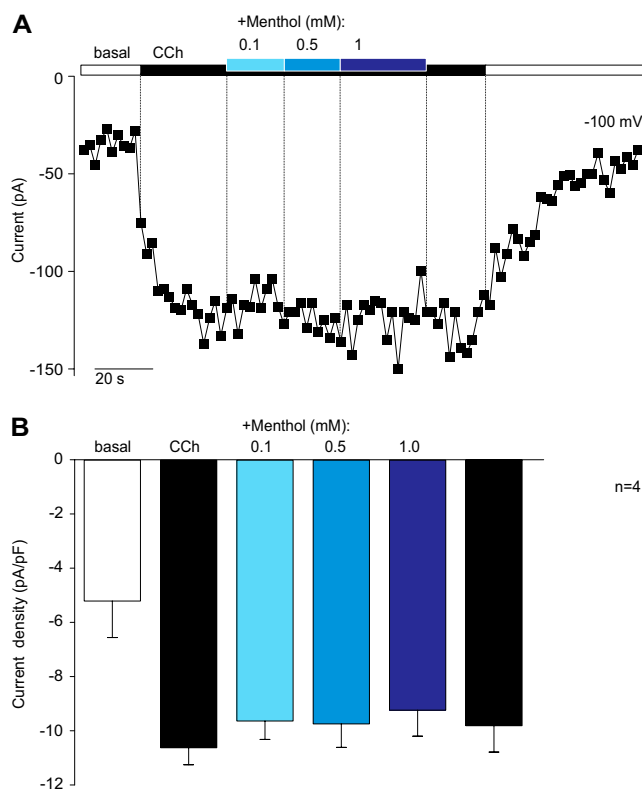

**Fig. S1.** Sensitivity of TRPC5 to menthol. (A) To determine the effects of menthol on TRPC5, we recorded currents from TRPC5- and M1-expressing HEK cells in response to 100  $\mu$ M carbachol (CCh) application and then added 0.1 mM, 0.5 mM, or 1.0 mM menthol and 100  $\mu$ M CCh to the cells. (B) No significant change in current density was observed during perfusion of menthol at any concentration we tested ( $n = 4$ ). We noted a trend toward a slight reduction in current density over time, probably resulting from slow desensitization of the channel. The pipette contained a solution (in mM) of 110 Cs-Asp, 2 MgCl<sub>2</sub>, 6 CaCl<sub>2</sub>, 10 Cs-BAPTA, 10 Hepes, 4 Mg-ATP, 0.3 Na-GTP, pH 7.2, with CsOH (~350 nM free Ca<sup>2+</sup>). The bath contained a solution (in mM) of 150 NaCl, 4 KCl, 2 CaCl<sub>2</sub>, 1 MgCl<sub>2</sub>, 10 Hepes, 10 glucose, pH 7.4 with NaOH.









these CC-fibers are able to encode at or below the noxious cold threshold (indicated as a band between 10–15 °C). (E, F, and H give data for individual fibers illustrated in the respective panels of Fig. S6.) (H–J) Recording of a cold receptor with a large dynamic range, slow adaptation properties, and menthol sensitivity (*TRPC5*<sup>-/-</sup>, conduction velocity = 0.47 m/s, threshold temperature = 36.6 °C). (H) Instantaneous frequency plot (i.f.p. s<sup>-1</sup>) shows the response of the thermosensor to temperature changes. Each dot represents one action potential; lower traces indicate the time course of the cold stimulus. Blue columns indicate cold stimulation; gray columns numbered 1–3 mark time frames expanded in three lower graphs. (I) The highly dynamic response pattern of this receptor class is illustrated: A temperature change of -0.25 °C leads to a phasic response at high rates (8–16/s). (2) Static and dynamic response pattern of CC-fibers with distinctively graded static discharge at any temperature within the dynamic range (e.g., 11.5/s at 30.4 °C and 12.9/s at 31.6 °C, averaged over >1 min). (3) Rewarming from a cold stimulus leads to immediate zero adaptation (dotted line at ~185 s in graph H, zero adaptation), whereas a small temperature gradient leads to unchanged activity (arrow at ~255 s). (I and J) The response pattern to the application of menthol. (Inset) Average spike shape of the response (*n* = 2,384 action potentials; SD = ±0.57; *y* = 200 μV, *x* = 1 ms). (I) Application of menthol led to excitation at 36.6 °C (threshold temperature) and an increased sensitivity to small negative temperature changes (arrowheads). (J) Strong increase in adaptation to cold stimulation. Note zero adaptation at 32 °C (arrow).

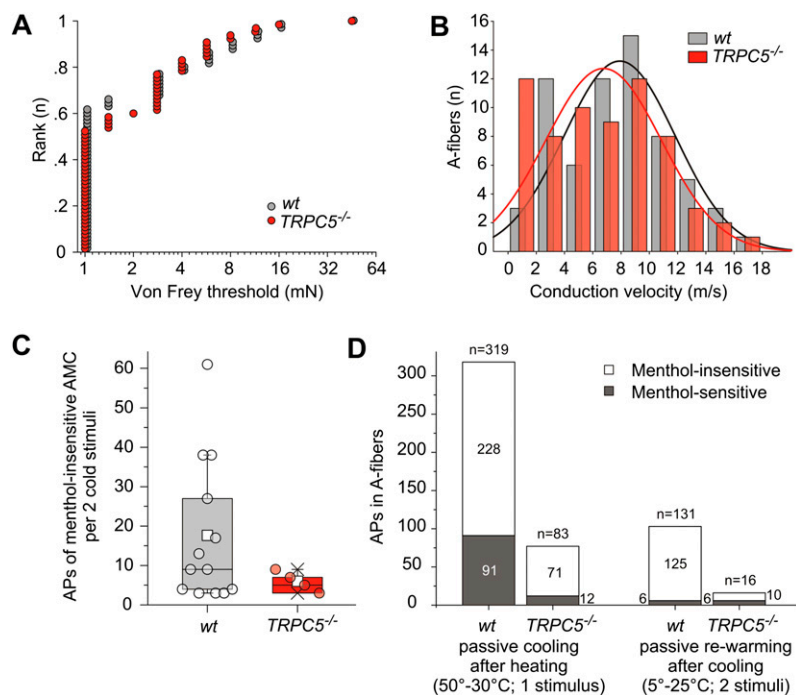

**Fig. S6.** Loss of function in A $\delta$ -cold nociceptors (AMC) in WT and *TRPC5*<sup>-/-</sup> fibers. (A) Von Frey thresholds of all A $\delta$ -mechanosensitive (AM) WT and *TRPC5*<sup>-/-</sup> fibers (*n* = 65 each). Thresholds are ranked from low to high; median = 1 mN. (B) Conduction velocity histogram of all A $\delta$ -fibers is Gaussian with average WT velocities of  $6.71 \pm 0.5$  m/s and average *TRPC5*<sup>-/-</sup> velocities of  $6.04 \pm 0.5$  m/s. (C) Response magnitude of all cold-sensitive menthol-insensitive A $\delta$ -fibers shown in main Fig. 4I. (D) (Left) Cumulative number of action potentials (APs) during 60 s of passive cooling from 50°–30 °C after heat stimulation (*n* = 65 fibers per genotype). (Right) Number of action potentials discharged during two periods of rewarming to skin temperature from a cold stimulus (~5–30 °C; *n* = 65 fibers per genotype).

**Table S1. Primary antibodies**

| Name                                   | Host  | Antigen characteristics                                                               | Catalog no.; source                                  | Dilution    | Reference |
|----------------------------------------|-------|---------------------------------------------------------------------------------------|------------------------------------------------------|-------------|-----------|
| Neurofilament heavy chain (NF200)      | Rb; p | Full-length native protein                                                            | ab8135; Abcam, Cambridge, MA                         | M1:1000     | (1, 2)    |
| Peripherin                             | Ck; p | Recombinant protein expressed in bacteria                                             | ab39374; Abcam, Cambridge, MA                        | M1:500H1:50 | (3)       |
| Calcitonin gene-related peptide (CGRP) | Rb; p | Synthetic rat $\alpha$ -CGRP                                                          | T-4032; Bachem Group, Peninsula Labs, San Carlos, CA | M1:1000     | (4)       |
| TRPV1                                  | Gp; p | C terminus of rat TRPV1 (YTGSLKPEDAIEVFKDSMVPGEK)                                     | GP14100; Neuromics, Edina, MN                        | M1:1000     | (5, 6)    |
| TRPM8                                  | Rb; p | short peptide of N terminus of TRPM8                                                  | KAL-KM060; CosmoBio, Carlsbad, CA                    | M1:500H1:50 | (7, 8)    |
| TRPC5*                                 | Ms; m | Synthetic peptide; aa 827–845 of human TRPC5 (SKAESSKRSFMGSPSLKKL)                    | 75–104; NeuroMab, Davis, CA                          | H1:200      | (9, 10)   |
| TRPC5                                  | Rb; p | Peptide; aa 9590973 of human TRPC5 (CHKWGDGQEEQVTRRL)                                 | ACC-020; Alomone Labs Ltd, Jerusalem, Israel         | M1:2000     | (11)      |
| PGP9.5                                 | Rb; p | Recombinant human UCH-L1 (full length native protein)                                 | AB1761, Millipore Corporation                        | H1:2000     | (12, 13)  |
| PGP9.5                                 | Gp; p | Full-length native protein                                                            | ab5898; Abcam, Cambridge, MA                         | H1:200      | (14, 15)  |
| Isolectin B4 (IB4)                     | N/A   | Lectin; Griffonia simplicifolia B4 subunit binding to $\alpha$ -D-galactosyl residues | I21412; Invitrogen, Carlsbad, CA                     | M1:500      | (16, 17)  |

Ck, chicken; Gp, guinea pig; H, human; M, mouse; m, monoclonal; Ms, mouse; p, polyclonal; PGP9.5, protein gene product 9.5; Rb, rabbit; TRPV1, TRP receptor potential cation channel subfamily V member 1.

\*The NeuroMab antibody was labeled directly to eliminate nonspecific staining (*SI Materials and Methods*).

- Girard C, et al. (2008) Etifoxine improves peripheral nerve regeneration and functional recovery. *Proc Natl Acad Sci USA* 105:20505–20510.
- Harris J, Ayyub C, Shaw G (1991) A molecular dissection of the carboxyterminal tails of the major neurofilament subunits NF-M and NF-H. *J Neurosci Res* 30:47–62.
- McLean J, et al. (2010) Distinct biochemical signatures characterize peripherin isoform expression in both traumatic neuronal injury and motor neuron disease. *J Neurochem* 114(4): 1177–1192.
- Lennerz JK, et al. (2008) Calcitonin receptor-like receptor (CLR), receptor activity-modifying protein 1 (RAMP1), and calcitonin gene-related peptide (CGRP) immunoreactivity in the rat trigeminovascular system: Differences between peripheral and central CGRP receptor distribution. *J Comp Neurol* 507:1277–1299.
- Caterina MJ, et al. (1997) The capsaicin receptor: A heat-activated ion channel in the pain pathway. *Nature* 389:816–824.
- Guo A, Vulchanova L, Wang J, Li X, Elde R (1999) Immunocytochemical localization of the vanilloid receptor 1 (VR1): Relationship to neuropeptides, the P2X3 purinoceptor and IB4 binding sites. *Eur J Neurosci* 11:946–958.
- Bautista DM, et al. (2007) The menthol receptor TRPM8 is the principal detector of environmental cold. *Nature* 448:204–208.
- Obata K, et al. (2005) TRPA1 induced in sensory neurons contributes to cold hyperalgesia after inflammation and nerve injury. *J Clin Invest* 115:2393–2401.
- Gomis A, Soriano S, Belmonte C, Viana F (2008) Hypoosmotic- and pressure-induced membrane stretch activate TRPC5 channels. *J Physiol* 586(Pt 23):5633–5649.
- Riccio A, et al. (2009) Essential role for TRPC5 in amygdala function and fear-related behavior. *Cell* 137(4):761–772.
- Facemire CS, Mohler PJ, Arendshorst WJ (2004) Expression and relative abundance of short transient receptor potential channels in the rat renal microcirculation. *Am J Physiol Renal Physiol* 286(3):F546–F551.
- Thompson RJ, Doran JF, Jackson P, Dhillon AP, Rode J (1983) PGP 9.5—A new marker for vertebrate neurons and neuroendocrine cells. *Brain Res* 278(1-2):224–228.
- Wilson PO, et al. (1988) The immunolocalization of protein gene product 9.5 using rabbit polyclonal and mouse monoclonal antibodies. *Br J Exp Pathol* 69(1):91–104.
- Day IN, Hinks LJ, Thompson RJ (1990) The structure of the human gene encoding protein gene product 9.5 (PGP9.5), a neuron-specific ubiquitin C-terminal hydrolase. *Biochem J* 268(2): 521–524.
- Navarro X, Verdu E, Wendelschafer-Crabb G, Kennedy WR (1997) Immunohistochemical study of skin reinnervation by regenerative axons. *J Comp Neurol* 380(2):164–174.
- Li H, Nomura S, Mizuno N (1997) Binding of the isolectin I-B4 from *Griffonia simplicifolia* to the general visceral afferents in the vagus nerve: A light- and electronmicroscope study in the rat. *Neurosci Lett* 222(1):53–56.
- Wang HF, Robertson B, Grant G (1998) Anterograde transport of horseradish peroxidase conjugated isolectin B4 from *Griffonia simplicifolia* I in spinal primary sensory neurons of the rat. *Brain Res* 811(1-2):34–39.

**Table S2. Immunohistochemical analysis of pairs of WT and TRPC5<sup>-/-</sup> lumbar DRG neurons**

| Marker                     | TRPC5 genotype | Total neurons | Positive neurons | Percentage $\pm$ SEM |
|----------------------------|----------------|---------------|------------------|----------------------|
| NF200 ( <i>n</i> = 1)      | +/+            | 3,152         | 1,293            | 41.0 $\pm$ 1.6       |
|                            | -/-            | 3,234         | 1,331            | 41.2 $\pm$ 1.5       |
| Peripherin ( <i>n</i> = 1) | +/+            | 2,819         | 1,062            | 56.8 $\pm$ 1.3       |
|                            | -/-            | 3,325         | 1,882            | 56.6 $\pm$ 1.4       |
| CGRP ( <i>n</i> = 1)       | +/+            | 2,073         | 406              | 19.6 $\pm$ 1.2       |
|                            | -/-            | 2,678         | 577              | 21.5 $\pm$ 1.1       |
| IB4 ( <i>n</i> = 1)        | +/+            | 3,859         | 1,134            | 29.4 $\pm$ 1.3       |
|                            | -/-            | 3,365         | 1,055            | 31.4 $\pm$ 1.6       |
| TRPV1 ( <i>n</i> = 2)      | +/+            | 5,702         | 1,022            | 17.9 $\pm$ 0.8       |
|                            | -/-            | 5,194         | 844              | 16.2 $\pm$ 0.5       |
| TRPM8 ( <i>n</i> = 3)      | +/+            | 5,835         | 1,076            | 18.2 $\pm$ 0.6       |
|                            | -/-            | 6,745         | 739              | 10.9 $\pm$ 0.6       |

Sensory neurons were labeled for Neurofilament 200 (NF200), Peripherin, IB4, CGRP, TRPV1, and TRPM8 antibodies; *n* indicates number of pairs of lumbar dorsal root ganglia.



**Table S3. Functional expression of TRP subtypes in cultured DRG neurons identified by characteristic pharmacological tools**

| Subtype                     | TRPM8<br>Menthol (100 $\mu$ M) |     | TRPA1<br>Allyl isothiocyanate (100 $\mu$ M) |      | TRPV1<br>Capsaicin (10 $\mu$ M) |      |
|-----------------------------|--------------------------------|-----|---------------------------------------------|------|---------------------------------|------|
|                             | Sensitive/total neurons        | %   | Sensitive/total neurons                     | %    | Sensitive/total neurons         | %    |
| WT                          | 82/989                         | 8.3 | 132/333                                     | 39.6 | 112/333                         | 33.6 |
| <i>TRPC5</i> <sup>-/-</sup> | 49/1,022                       | 4.8 | 102/333                                     | 30.6 | 100/333                         | 30.0 |

Cultured sensory neurons were subjected to stimulation with TRP channel agonists in calcium imaging.

**Table S4. Mechanosensitive C-fiber subtypes in WT, *TRPC5*<sup>-/-</sup>, and *TRPM8*<sup>-/-</sup> mice**

| Genotype                    | Fiber types<br>Total <i>n</i> | CM       |    | CMC      |    | CMCH     |    | CMH      |    |
|-----------------------------|-------------------------------|----------|----|----------|----|----------|----|----------|----|
|                             |                               | <i>n</i> | %  | <i>n</i> | %  | <i>n</i> | %  | <i>n</i> | %  |
| <i>TRPC5</i> <sup>+/+</sup> | 55                            | 16       | 29 | 16       | 29 | 6        | 11 | 17       | 31 |
| <i>TRPC5</i> <sup>-/-</sup> | 55                            | 14       | 25 | 22       | 40 | 1        | 2  | 18       | 33 |
| <i>TRPM8</i> <sup>+/+</sup> | 32                            | 4        | 13 | 8        | 25 | 9        | 28 | 11       | 34 |
| <i>TRPM8</i> <sup>-/-</sup> | 32                            | 5        | 16 | 0        | 0  | 8        | 25 | 19       | 59 |

Criteria for classification of nociceptive C-fibers are described in *SI Materials and Methods*. *TRPM8*<sup>-/-</sup> mice were generated by Dhaka/Patapoutian and backcrossed on N5 generations onto C57/BL6 background; the different inbred backgrounds may entail strain differences in fiber subtypes. Note the lack of CMC-fibers in *TRPM8* knockout mice, associated with increased numbers of CMH-fibers; see also Fig. 4H.
